# Supplementary material for: Enhanced photoelectric performance of Bi2O2Se/CuInP2S6 heterojunction via ferroelectric polarization in two-dimensional CuInP2S6
Source: Royal Society of Chemistry journal article supplement (doi:10.1039/d4cp02367f), 2024-01-01
Supplement: d4cp02367f1.pdf [file d4cp02367f1.pdf]

## Supporting Information

# **Enhanced photoelectric performance of $\text{Bi}_2\text{O}_2\text{Se}/\text{CuInP}_2\text{S}_6$ heterojunction *via* ferroelectric polarization in two-dimensional $\text{CuInP}_2\text{S}_6$**

Di Wang<sup>1</sup>, Qiong Wu<sup>1</sup>, Kaihan Shan<sup>1</sup>, Mengwei Han<sup>2</sup>, Wenyu Jiang<sup>1</sup>,

Weiting Meng<sup>1</sup>, Yanqing Zhang<sup>3</sup>, Weiming Xiong<sup>1,a)</sup>

<sup>1</sup>School of Physical Science & Technology, Guangxi University, Nanning 530004, China

<sup>2</sup>Radar NCO College, Air Force Early Warning Academy, Wuhan 430345, China

<sup>3</sup>School of Physics & Electronics, Nanning Normal University, Nanning 530004, China

<sup>a)</sup>Author to whom correspondence should be addressed: [xiongw3@gxu.edu.cn](mailto:xiongw3@gxu.edu.cn)

## I. I-V characteristics and photoelectric response of BOS/CIPS heterojunction under illumination of 405 and 650 nm

Figs. S1 and S2 show the I-V curves of  $\text{Bi}_2\text{O}_2\text{Se}/\text{CuInP}_2\text{S}_6$  (BOS/CIPS) heterojunction under illumination of 405 and 650 nm, which are highly similar to those under other wavelengths shown in Figs. 3(a)-(c). The threshold voltage  $V_{\text{th1}}$  has a little change with the optical power intensity (OPI), and  $V_{\text{th2}}$  increases with the increase of OPI. The photocurrents  $I_{\text{ph}}$  increases with the increase of optical power intensity. The photoresponsivity ( $R$ ), external quantum efficiency (EQE), and normalized detectivity ( $D^*$ ) gradually decrease with the rise of OPI, which are similar to the rule of other wavelengths, indicating the broadband response properties of the heterojunction.

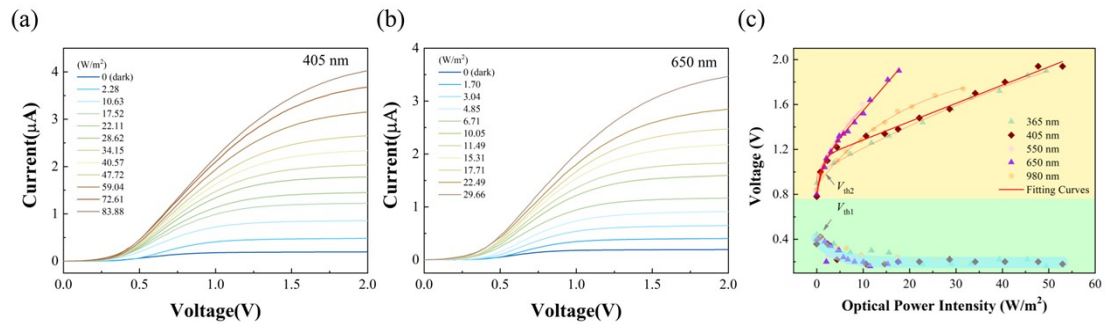

**FIG. S1.** I-V curves of BOS/CIPS heterojunction under various wavelengths of (a)405, (b) 650 nm and various OPIs. (c) Plots and fits of two threshold voltages ( $V_{\text{th1}}$  and  $V_{\text{th2}}$ ) as functions of wavelength and OPI.

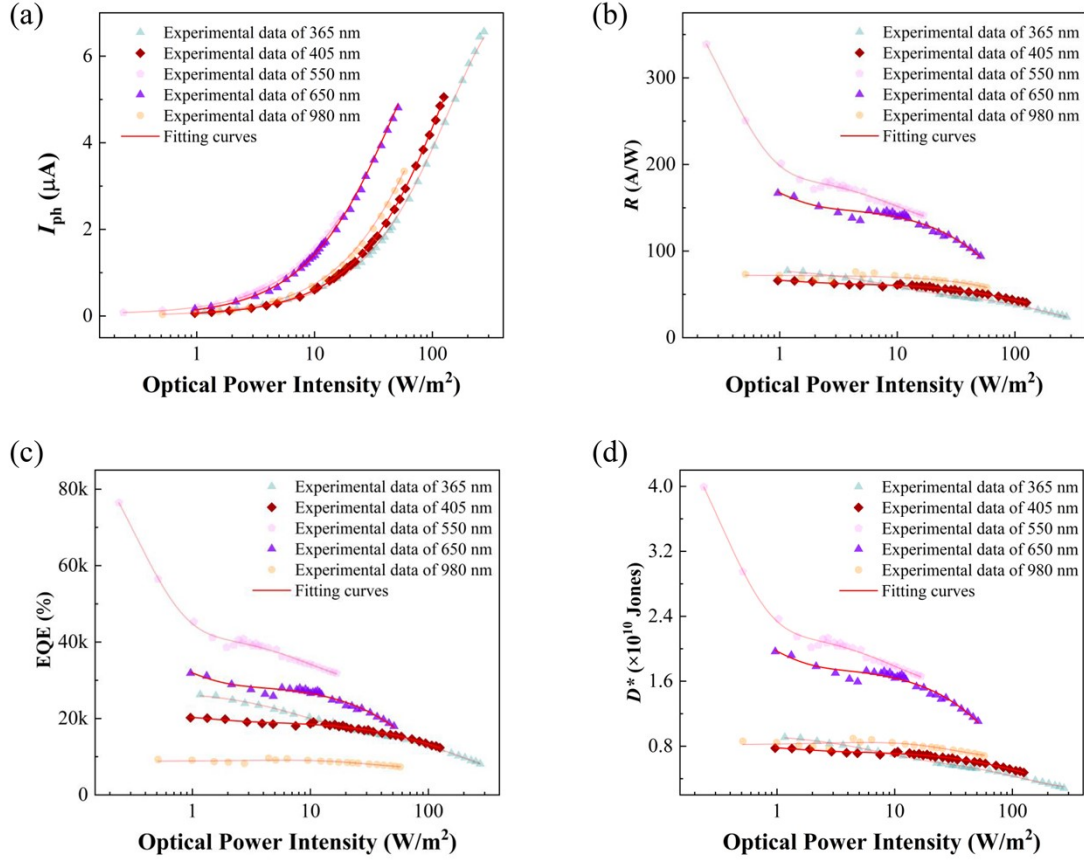

**Fig. S2.** (a) Photocurrents  $I_{ph}$ , (b) photoresponsivity  $R$ , (c) external quantum efficiency EQE, and (d) normalized detectivity  $D^*$  as functions of OPI. Experimental or calculated data of 365 (dark cyan triangle symbol), 405 (dark red diamond symbol), 550 (pink pentagon symbol), 650 nm (purple triangle symbol) and 980 nm (orange ball symbol) are plotted and fitted by red lines.

Figures S3(a) and S3(b) depict the current-voltage (I-V) characteristics of the photodetector under dark and illuminated conditions, respectively. These I-V curves exhibit three distinct regions with varying slopes. Specifically, stage I and III display a slope that is nearly zero, indicating a stable current response to the applied voltage, thereby facilitating the reliable operation of the photodetector. A comparison of Figs. S3(a) and S3(b) reveal a significantly larger slope in Stage II under the illuminated condition than that in the dark. This observation suggests that the current increases more rapidly with an increase in voltage under illumination, owing to the generation of photo-generated carriers.

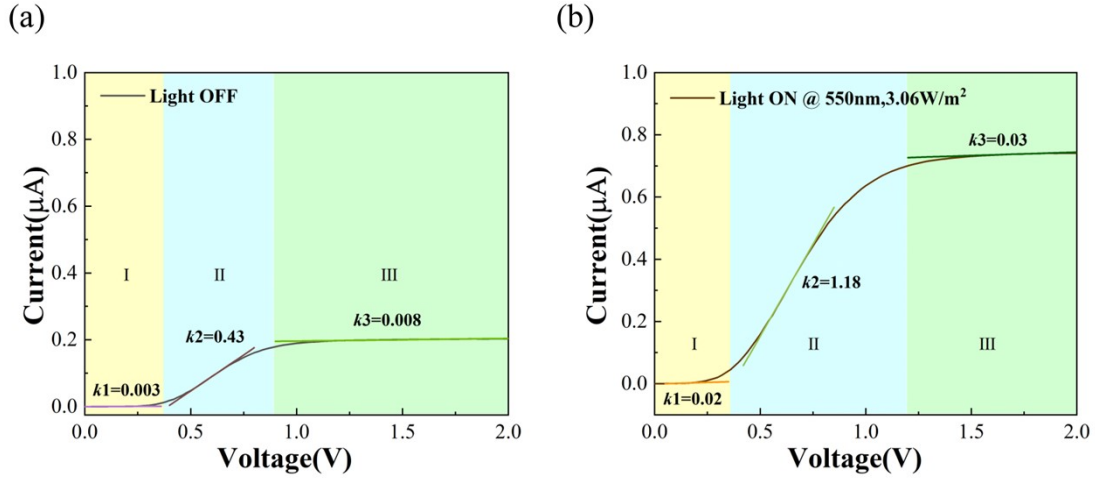

**Fig. S3.** The I-V curves at (a) dark and (b) 550nm, 3.06W/m<sup>2</sup> illumination are divided into three parts with different slopes.

## II. High stability of BOS/CIPS heterojunction device

In the experiments, the I-V curves have been measured 5 times under a certain wavelength and OPI to ensure the stability and reliability of the data. Table S1 presents some selected measured current values and the corresponding calculated statistical parameters (i.e., average value  $\bar{I}$ , standard deviation  $\sigma$ , and relative standard deviation (RSD)) at a wavelength of 550nm and an irradiance of 3.06W/m<sup>2</sup>, within the voltage scanning from 0 to 2V. Notably, the measured current values demonstrate a high degree of consistency, with standard deviations less than 4 nA. The relative standard deviation remains about 0.1% for voltages exceeding 0.6V. Correspondingly, the relationship of five-times-measured current and applied voltage have been plotted in Fig. S4. Curves measured for 5 times exhibited high levels of concordance, particularly at 2V. These results demonstrate the stability and repeatability of the photodetector.

**Table S1.** The selected current values were measured five times and the corresponding calculated average value  $\bar{I}$ , standard deviation  $\sigma$ , and relative standard deviation (RSD) under 550nm and 3.06W/m<sup>2</sup> illumination.

| $V$ (V) | $I_1$ (nA) | $I_2$ (nA) | $I_3$ (nA) | $I_4$ (nA) | $I_5$ (nA) | $\bar{I}$ (nA) | $\sigma$ (nA) | RSD (%) |
|---------|------------|------------|------------|------------|------------|----------------|---------------|---------|
| 0.00    | 0.2281     | 0.2196     | 0.1511     | 0.1610     | 0.1558     | 0.1831         | 0.0335        | 18.2946 |
| 0.06    | 0.6237     | 0.6501     | 0.4782     | 0.4739     | 0.4577     | 0.5367         | 0.0825        | 15.3712 |
| 0.12    | 1.8000     | 1.8681     | 1.3900     | 1.3375     | 1.4093     | 1.5610         | 0.2252        | 14.4298 |

|      |          |          |          |          |          |          |        |         |
|------|----------|----------|----------|----------|----------|----------|--------|---------|
| 0.18 | 4.9959   | 5.3417   | 4.0583   | 4.1098   | 4.1485   | 4.5308   | 0.5330 | 11.7644 |
| 0.24 | 13.7446  | 13.7192  | 10.7161  | 11.7374  | 12.0146  | 12.3864  | 1.1807 | 9.5324  |
| 0.30 | 32.9218  | 33.6766  | 27.1365  | 26.5100  | 28.0303  | 29.6551  | 3.0239 | 10.1968 |
| 0.36 | 62.0129  | 62.7452  | 55.7492  | 54.0928  | 55.3473  | 57.9895  | 3.6329 | 6.2647  |
| 0.42 | 104.0159 | 107.1703 | 98.5818  | 96.5704  | 98.9249  | 101.0527 | 3.9225 | 3.8816  |
| 0.48 | 160.1877 | 161.7946 | 154.3476 | 154.1777 | 154.7498 | 157.0515 | 3.2619 | 2.0770  |
| 0.54 | 228.7337 | 227.9851 | 223.5737 | 221.6965 | 226.0608 | 225.6100 | 2.6482 | 1.1738  |
| 0.60 | 301.6194 | 306.8333 | 302.2289 | 298.5077 | 303.1489 | 302.4676 | 2.6826 | 0.8869  |
| 0.66 | 381.4926 | 384.4714 | 382.1544 | 377.1957 | 380.2666 | 381.1161 | 2.3903 | 0.6272  |
| 0.72 | 455.4261 | 456.6544 | 453.9902 | 454.5767 | 456.1223 | 455.3539 | 0.9747 | 0.2141  |
| 0.78 | 524.7431 | 525.4220 | 524.3500 | 524.5155 | 525.4701 | 524.9001 | 0.4631 | 0.0882  |
| 0.84 | 585.3696 | 585.8545 | 585.1053 | 587.0220 | 586.9404 | 586.0584 | 0.7913 | 0.1350  |
| 0.90 | 637.2689 | 637.7247 | 636.9621 | 638.1422 | 638.0479 | 637.6292 | 0.4522 | 0.0709  |
| 0.96 | 679.2213 | 680.9044 | 681.1229 | 681.7012 | 681.9225 | 680.9744 | 0.9516 | 0.1397  |
| 1.02 | 715.1856 | 715.3628 | 716.1440 | 718.0569 | 716.2884 | 716.2075 | 1.0187 | 0.1422  |
| 1.08 | 742.4905 | 742.6946 | 743.5920 | 744.8972 | 743.4018 | 743.4152 | 0.8488 | 0.1142  |
| 1.14 | 763.6580 | 764.7809 | 765.2733 | 766.6139 | 764.7927 | 765.0238 | 0.9559 | 0.1249  |
| 1.20 | 779.6771 | 780.6839 | 780.8485 | 782.4415 | 781.1490 | 780.9600 | 0.8905 | 0.1140  |
| 1.26 | 792.0071 | 792.4659 | 792.5610 | 794.5767 | 793.5358 | 793.0293 | 0.9201 | 0.1160  |
| 1.32 | 801.0172 | 801.6792 | 801.7651 | 804.2223 | 802.7778 | 802.2923 | 1.1172 | 0.1392  |
| 1.38 | 808.3293 | 809.0630 | 809.0208 | 810.7916 | 809.2709 | 809.2951 | 0.8126 | 0.1004  |
| 1.44 | 813.2475 | 814.1890 | 814.0930 | 816.3831 | 814.8035 | 814.5432 | 1.0450 | 0.1283  |
| 1.50 | 816.8280 | 817.8629 | 818.1959 | 820.1122 | 818.7064 | 818.3411 | 1.0779 | 0.1317  |
| 1.56 | 819.8415 | 821.7394 | 821.5950 | 823.2996 | 821.3850 | 821.5721 | 1.0993 | 0.1338  |
| 1.62 | 822.7154 | 823.8956 | 824.1216 | 824.7744 | 824.3156 | 823.9645 | 0.6883 | 0.0835  |
| 1.68 | 824.5248 | 826.1617 | 825.6666 | 827.0808 | 826.5914 | 826.0051 | 0.8754 | 0.1060  |
| 1.74 | 825.7967 | 828.4505 | 827.0266 | 828.5519 | 827.7585 | 827.5168 | 1.0198 | 0.1232  |
| 1.80 | 827.1638 | 829.3600 | 828.0329 | 829.9842 | 829.1449 | 828.7372 | 1.0080 | 0.1216  |
| 1.86 | 828.1862 | 830.2258 | 828.3671 | 830.5983 | 830.2241 | 829.5203 | 1.0261 | 0.1237  |
| 1.92 | 829.4080 | 830.8710 | 829.7317 | 831.1795 | 831.9730 | 830.6326 | 0.9449 | 0.1138  |
| 1.98 | 829.6399 | 831.9443 | 830.6080 | 832.1510 | 831.9274 | 831.2541 | 0.9754 | 0.1173  |
| 2.00 | 829.7683 | 832.3412 | 831.1345 | 832.2944 | 832.8989 | 831.6875 | 1.1182 | 0.1345  |

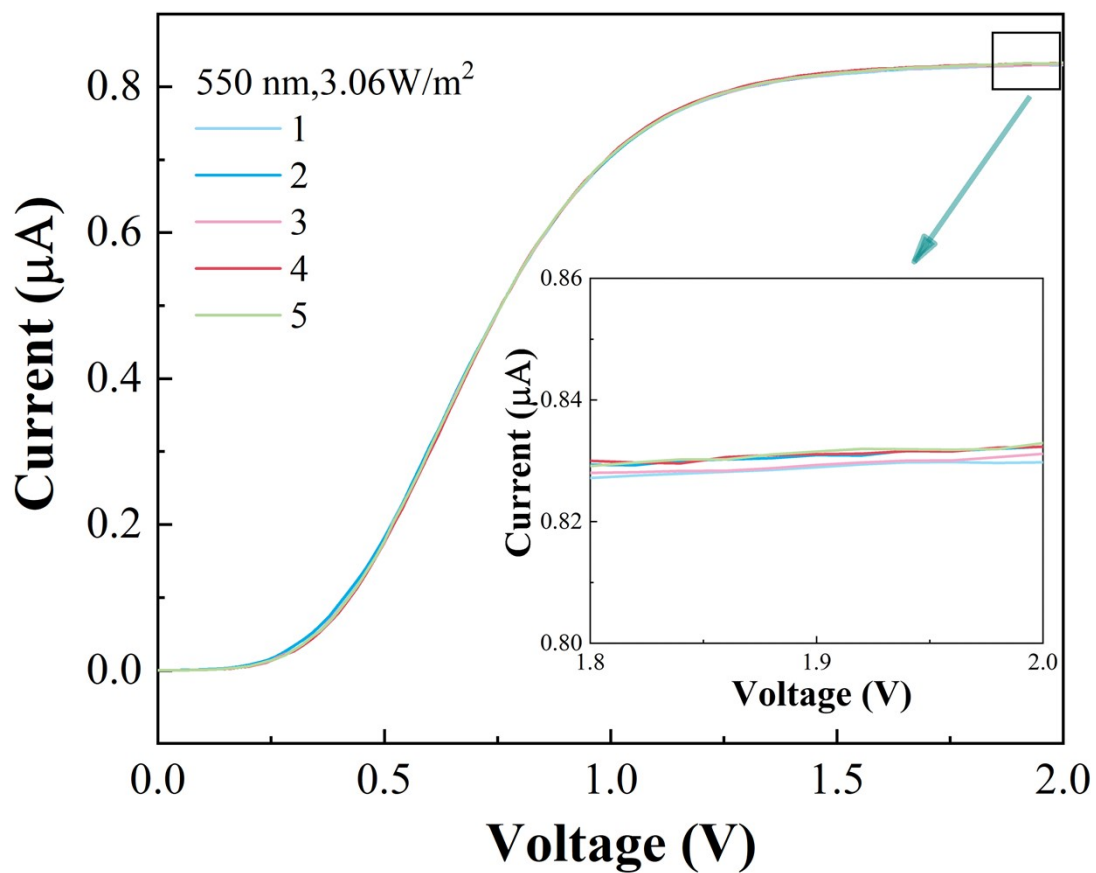

**Fig. S4.** I-V curves and locally enlarged images measured five times under 550 nm and 3.06 W/m<sup>2</sup> illumination.

### III. The optical image of CVD-grown BOS nanosheets

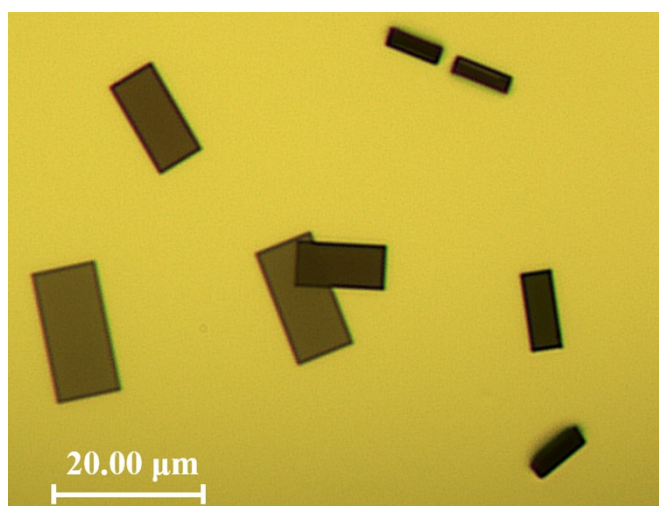

**Fig. S5** BOS nanosheets grown on fluorophlogopite substrate

#### IV. Comparison of I-V characteristics of individual BOS and CIPS nanosheets and BOS/CIPS heterojunction

We focus on the electric responses of individual BOS and CIPS nanosheets and BOS/CIPS heterojunction. Electrodes are deposited on the BOS and CIPS to form the electric devices, as shown in Figs. S6a and S6b. Then, the I-V curves of BOS and CIPS nanosheets are measured. By comparing the I-V curves of CIPS, BOS and heterojunction, as shown in Figs. S6d-S6f, we can see that the I-V curves of heterojunction are asymmetrical and significantly different from those of the individual materials. For the BOS nanosheet, the current reaches  $1.25 \mu\text{A}$  at  $0.1 \text{ V}$  in the dark, indicating its high carrier mobility. Under the light illumination condition, the current increases to about  $3.6 \mu\text{A}$  at  $0.1 \text{ V}$ , demonstrating the excellent photoelectric response of BOS nanosheet. For the CIPS nanosheet, the I-V curve exhibits strong nonlinear and the nonzero current under zero applied voltage demonstrates the effect of ferroelectric polarization-induced built-in electric field on the I-V characteristics. For the BOS/CIPS heterojunction, we have obtained the I-V curves under dark and illuminated conditions, as shown in Fig. S6f.

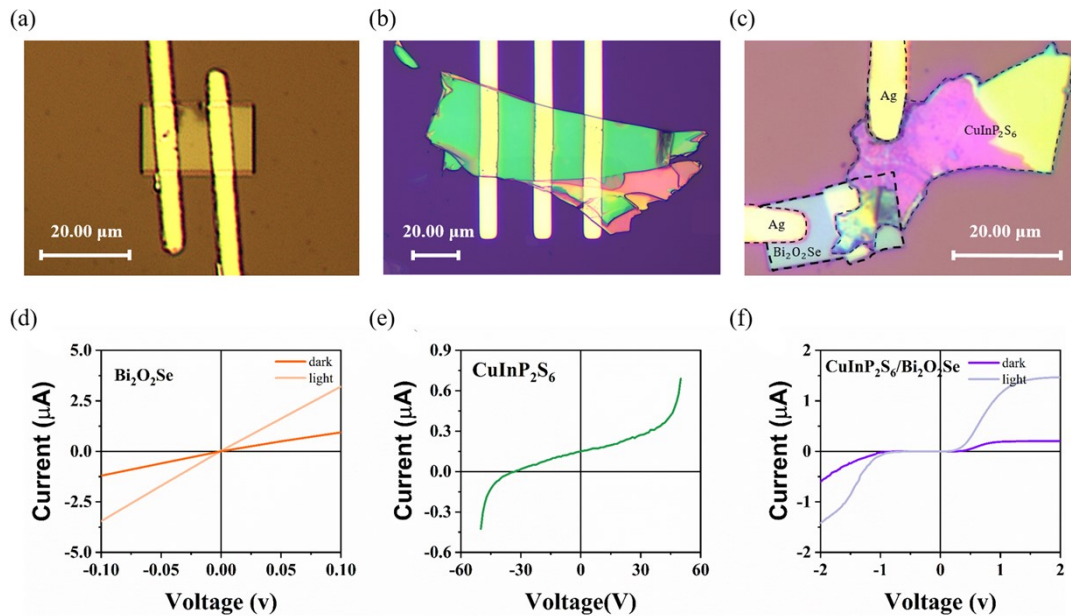

**Fig. S6** Optical images of the test structures of individual (a) BOS (b) CIPS nanosheets and (c) BOS/CIPS heterojunction. Corresponding *I-V* characteristics of individual (d) BOS (e) CIPS nanosheets and (f) BOS/CIPS heterojunction

## V. Influence of shot noise and 1/f noise on normalized detectivity $D^*$

Generally speaking, shot noise is caused by the dispersion of carriers, which is the main source of noise in most semiconductor devices. The formula of the shot noise current is  $i_{shot} = \sqrt{2eI_{dark}\Delta f}$ , where  $e$  is the electron charge,  $I_{dark}$  is the dark current of our device,  $\Delta f$  is the bandwidth. According to our measured data, the shot noise current is calculated to be  $3.3 \times 10^{-10}$  A for our device. Then, we can obtain the equivalent noise power by  $P_{NEP} = i_{shot}^2/R$ , where  $R$  is the photoresponsivity. If only shot noise is considered, the normalized detectivity can be written as  $D^* = \sqrt{S\Delta f}/P_{NEP}$ , this

formula also can be written as  $D^* = \frac{R}{\sqrt{\frac{2eI_{dark}}{S}}}$ , which is consistent with the formula used in this work.<sup>S1</sup>

On the other hand, the 1/f noise is usually caused by local defects or trace impurities in the device, and is inversely proportional to the circuit frequency, mainly in the low-frequency domain below 1 kHz. If both 1/f noise and shot noise are

considered, the root-mean-square noise current, *i.e.*,  $i_n = \sqrt{\frac{\sum_{1}^N (I_i - \bar{I})^2}{N}}$ , is calculated by measuring the time-dependent current of the device in the dark state under a certain applied voltage (*i.e.*, 2V), as shown in **Tab. S2**. Then, the equivalent noise power is obtained by  $P_{NEP} = i_n^2/R$ . Finally, the  $D^*$  could be calculated by  $D^* = \sqrt{S\Delta f}/P_{NEP}$ . Considering the 1/f noise and shot noise, the calculated  $D^*$  is about  $1.05 \times 10^9$  Jones at 550 nm, which is a little smaller than the one that the only shot noise is considered ( $2.81 \times 10^9$  Jones).

After referring to a large number of relevant literatures<sup>S2-S11</sup>, we find that the normalized detectivity is generally calculated by  $D^* = R/\sqrt{2eI_{dark}/S}$  and only the shot noise is considered in the calculation, as listed in **Tab. S2**. In order to have



comparability with the detector performance in previous works<sup>11,15,26,27,40-42</sup>, we only consider the influence of shot noise on the value of  $D^*$  and the  $1/f$  noise is neglected in this work.

Table S2

Time-dependent current data of devices in dark state at 2V

| Time (s) | $I_{\text{dark}}$ (A) | Time (s) | $I_{\text{dark}}$ (A) | Time (s) | $I_{\text{dark}}$ (A) |
|----------|-----------------------|----------|-----------------------|----------|-----------------------|
| 1.53350  | 3.40E-07              | 1.53566  | 3.45E-07              | 1.53782  | 3.43E-07              |
| 1.53357  | 3.41E-07              | 1.53573  | 3.43E-07              | 1.53788  | 3.46E-07              |
| 1.53363  | 3.40E-07              | 1.53579  | 3.44E-07              | 1.53795  | 3.43E-07              |
| 1.53370  | 3.41E-07              | 1.53586  | 3.42E-07              | 1.53802  | 3.42E-07              |
| 1.53376  | 3.43E-07              | 1.53592  | 3.43E-07              | 1.53808  | 3.44E-07              |
| 1.53383  | 3.42E-07              | 1.53599  | 3.44E-07              | 1.53815  | 3.45E-07              |
| 1.53389  | 3.41E-07              | 1.53605  | 3.42E-07              | 1.53821  | 3.42E-07              |
| 1.53396  | 3.41E-07              | 1.53612  | 3.43E-07              | 1.53828  | 3.44E-07              |
| 1.53402  | 3.40E-07              | 1.53618  | 3.42E-07              | 1.53834  | 3.42E-07              |
| 1.53409  | 3.41E-07              | 1.53625  | 3.44E-07              | 1.53841  | 3.43E-07              |
| 1.53415  | 3.44E-07              | 1.53631  | 3.44E-07              | 1.53848  | 3.44E-07              |
| 1.53422  | 3.41E-07              | 1.53638  | 3.43E-07              | 1.53854  | 3.43E-07              |
| 1.53428  | 3.41E-07              | 1.53644  | 3.43E-07              | 1.53861  | 3.43E-07              |
| 1.53435  | 3.41E-07              | 1.53651  | 3.43E-07              | 1.53867  | 3.42E-07              |
| 1.53441  | 3.42E-07              | 1.53658  | 3.42E-07              | 1.53874  | 3.43E-07              |
| 1.53448  | 3.42E-07              | 1.53664  | 3.45E-07              | 1.53880  | 3.45E-07              |
| 1.53455  | 3.43E-07              | 1.53671  | 3.42E-07              | 1.53887  | 3.43E-07              |
| 1.53461  | 3.42E-07              | 1.53677  | 3.44E-07              | 1.53893  | 3.42E-07              |
| 1.53468  | 3.42E-07              | 1.53684  | 3.45E-07              | 1.53900  | 3.43E-07              |
| 1.53474  | 3.45E-07              | 1.53691  | 3.44E-07              | 1.53906  | 3.42E-07              |
| 1.53481  | 3.43E-07              | 1.53697  | 3.44E-07              | 1.53913  | 3.46E-07              |
| 1.53488  | 3.43E-07              | 1.53704  | 3.43E-07              | 1.53920  | 3.43E-07              |
| 1.53494  | 3.42E-07              | 1.53710  | 3.42E-07              | 1.53926  | 3.42E-07              |
| 1.53500  | 3.43E-07              | 1.53717  | 3.43E-07              | 1.53933  | 3.43E-07              |
| 1.53507  | 3.47E-07              | 1.53723  | 3.45E-07              | 1.53939  | 3.45E-07              |
| 1.53513  | 3.43E-07              | 1.53730  | 3.43E-07              | 1.53946  | 3.44E-07              |
| 1.53520  | 3.43E-07              | 1.53736  | 3.43E-07              | 1.53952  | 3.42E-07              |
| 1.53527  | 3.42E-07              | 1.53743  | 3.43E-07              | 1.53959  | 3.43E-07              |
| 1.53533  | 3.43E-07              | 1.53749  | 3.42E-07              | 1.53965  | 3.42E-07              |
| 1.53540  | 3.46E-07              | 1.53756  | 3.46E-07              | 1.53972  | 3.43E-07              |
| 1.53546  | 3.43E-07              | 1.53762  | 3.43E-07              | 1.53978  | 3.44E-07              |
| 1.53553  | 3.42E-07              | 1.53769  | 3.44E-07              | 1.53985  | 3.42E-07              |
| 1.53559  | 3.44E-07              | 1.53775  | 3.42E-07              | 1.53991  | 3.43E-07              |

$$\bar{I} = \frac{\sum_{1}^N I_i}{N} = 3.43 \times 10^{-7} A$$

$$i_n = \sqrt{\frac{\sum_{1}^N (I_i - \bar{I})^2}{N}} = 1.31 \times 10^{-9} A$$

$$P_{NEP} = \frac{i_n}{R} = 3.87 \times 10^{-12} W \quad (R = 338.94 A/W, @550nm)$$

$$D^* = \frac{\sqrt{S\Delta f}}{P_{NEP}} = 1.05 \times 10^9 \text{ Jones}$$

## References

- S1. Q. Wang, Y. Zhang, and Z. Wei, *Chin. J. Chem.*, 2023, **41**, 958-978.
- S2. L. Zeng, S. Lin, Z. Lou, H. Yuan, H. Long, Y. Li, W. Lu, S. Lau, D. Wu and Y. Tsang, *Asia Mater*, 2018, **10**, 352–362.
- S3. L. Ye, H. Li, Z. Chen, and J. Xu, *ACS Photonics*, 2016, **3**(4), 692-699.
- S4. D. Wu, C. Jia, F. Shi, L. Zeng, P. Lin, L. Dong, Z. Shi, Y. Tian, X. Lia and J. Jie, *J. Mater. Chem. A*, 2020, **8**, 3632-3642.
- S5. C. Fang, J. Han, M. Yu, W. Liu, S. Gao and K. Huang, *Adv. Mater. Interfaces*, 2022, **9**, 2102091.
- S6. D. Qiu, P. Hou, J. Wang and X. Ouyang, *Appl. Phys. Lett.*, 2023, **123**, 111102.
- S7. X. Liu, R. Li, C. Hong, G. Huang, D. Pan, Z. Ni, Y. Huang, X. Ren, Y. Cheng and W. Huang, *Nanoscale*, 2019, **11**, 20707–20714.
- S8. Y. Chen, W. Ma, C. Tan, M. Luo, W. Zhou, N. Yao, H. Wang, L. Zhang, T. Xu, T. Tong, Y. Zhou, Y. Xu, C. Yu, C. Shan, H. Peng, F. Yue, P. Wang, Z. Huang and W. Hu, *Adv. Funct. Mater.*, 2021, **31**, 2009554.
- S9. T. Yang, X. Li, L. Wang, Y. Liu, K. Chen, X. Yang, L. Liao, L. Dong and C. Shan, *J. Mater. Sci.*, 2019, **54**, 14742–14751.
- S10. X. Liu, W. Wang, F. Yang, S. Feng, Z. Hu, J. Lu and Z. Ni, *Sci. China Inf. Sci.*, 2021, **64**, 140404.

S11. M. Yang, X. Zhang, H. Zhou, G. Fu, X. Zhou, Y. Lian, J. Hao, H. Yu, X. Zhu and J. Wang, *J. Mater. Chem. C*, 2022, **10**, 15377-15385.
